# Supplementary material for: Two host–guest grown ether supramolecules show switchable phase transition, dielectric and second-harmonic generation effect
Source: Royal Society of Chemistry journal article supplement (doi:10.1039/d2dt01826h), 2022-01-01
Supplement: d2dt01826h1.pdf [file d2dt01826h1.pdf]

ESI

Two Host-Guest Grown Ether Supramolecules Show Switchable Phase Transition,  
Dielectric and Second-Harmonic Generation Effect

*Xing Ye*<sup>1</sup>, *Wenhui He*<sup>1</sup>, *Jing Wei*<sup>1</sup>, *Zhenhong Wei*<sup>1,\*</sup>, *Xiuli You*<sup>2</sup>, *Hu Cai*<sup>1,\*</sup>

<sup>1</sup> School of Chemistry and Chemical Engineering, Nanchang University, Nanchang 330031, People's Republic of China

<sup>2</sup> Jiangxi key laboratory of organic chemistry, Jiangxi science and technology normal university, Nanchang 330013, People's Republic of China

Corresponding author: weizh@ncu.edu.cn, or caihu@ncu.edu.cn

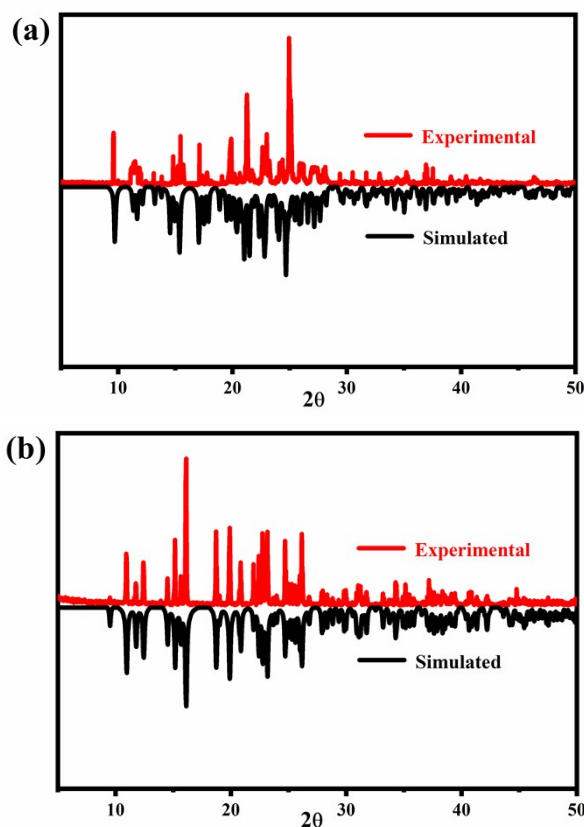

Figure S1. The powder X-ray diffraction patterns of compounds **1** (a) and **2** (b) with

the simulated one in black and the experimental one in red.

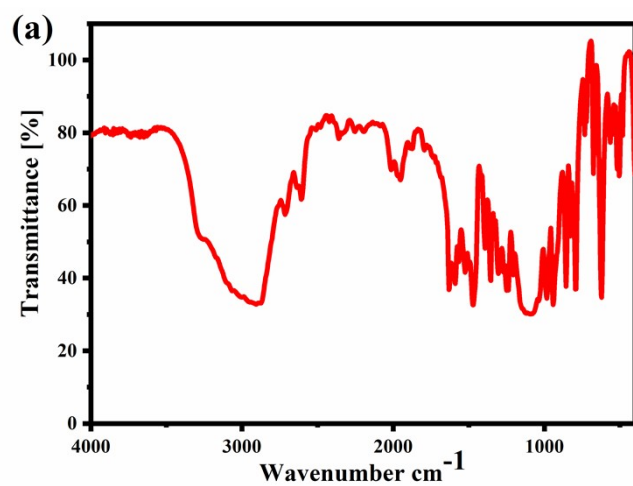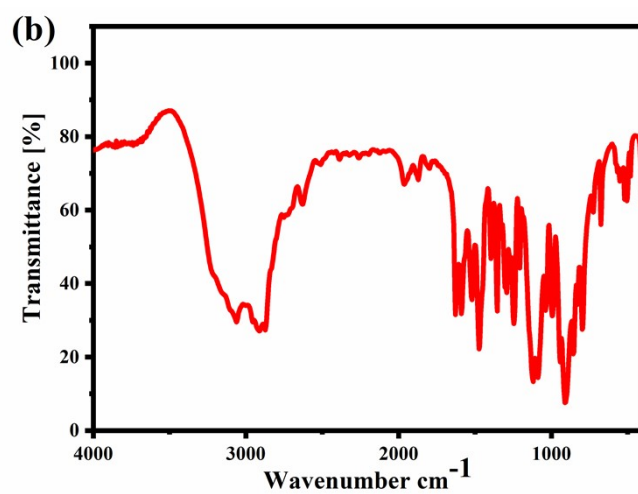

Figure S2. Infrared (IR) spectra of solid compounds 1 (a) and 2 (b) in KBr pellet recorded at room temperature.

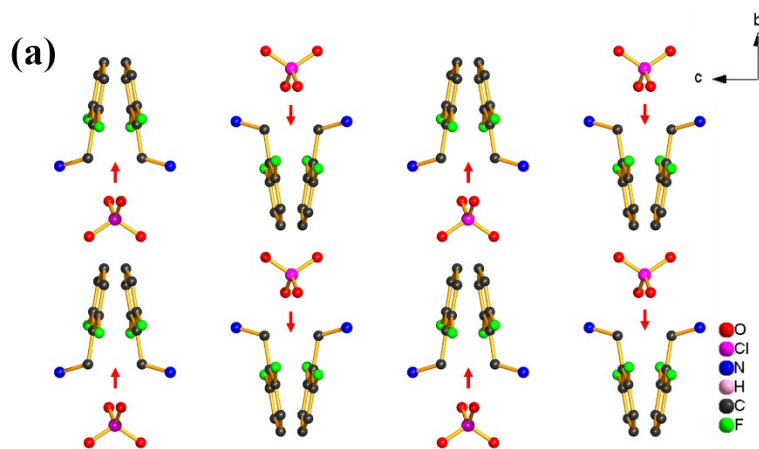

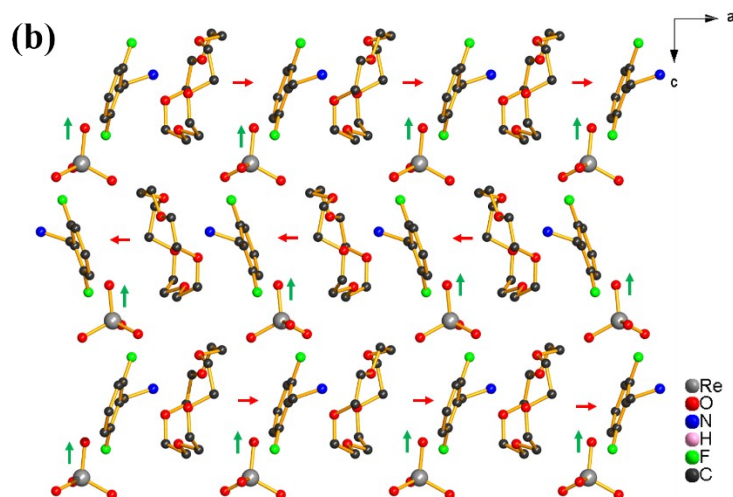

Figure S3. (a) the stacking packing of **1** viewed along the *a*-axis of compound **1**, (b) the stacking packing of **2** viewed along the *b*-axis of compound **2**.

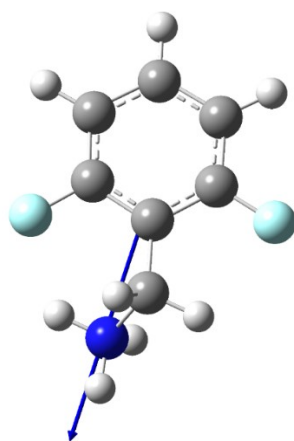

Figure S4. Schematic diagram of the dipole moment of the organic ammonium, the blue arrow indicates the direction of the dipole.

**Calculation condition:**

The geometry optimization and dipole moment were calculated at b3lyp/6-31G(d) level with Gaussian 16 software. DFT-D dispersion correction was treated with DFT-D3 method with Becke-Jonson damping.<sup>1</sup> We constructed molecular conformation based on the experimentally measured single crystal X-ray diffraction structure.

1. Grimme, S.; Ehrlich, S.; Goerigk, L., Effect of the Damping Function in Dispersion Corrected Density Functional Theory. *J Comput Chem* **2011**, *32* (7), 1456-1465.

Table S1. Bond lengths (Å) and angles (°) of **1** at 293 K.

| <b>1</b>               |          |          |          |
|------------------------|----------|----------|----------|
| O8-C12                 | 1.283(6) | O4-C9    | 1.431(4) |
| O10-C12                | 1.263(6) | O4-C8    | 1.448(5) |
| C11-O7                 | 1.373(4) | C11-C12  | 1.378(5) |
| C11-O7 <sup>1</sup>    | 1.373(4) | C11-C16  | 1.389(5) |
| C11-O6 <sup>1</sup>    | 1.399(3) | C11-C17  | 1.505(5) |
| C11-O6                 | 1.399(3) | F2-C12   | 1.351(4) |
| C12-O10 <sup>2</sup>   | 1.263(6) | C5-C6    | 1.501(5) |
| C12-O8 <sup>2</sup>    | 1.283(6) | C4-C3    | 1.501(5) |
| O2-C5                  | 1.424(4) | C12-C13  | 1.362(6) |
| O2-C4                  | 1.423(4) | C16-F1   | 1.348(5) |
| O3-C6                  | 1.414(5) | C16-C15  | 1.371(7) |
| O3-C7                  | 1.415(4) | C1-C2    | 1.505(5) |
| O5-C1                  | 1.408(4) | C10-C9   | 1.497(5) |
| O5-C10                 | 1.407(5) | C8-C7    | 1.478(6) |
| O1-C2                  | 1.411(4) | C15-C14  | 1.366(8) |
| O1-C3                  | 1.412(4) | C14-C13  | 1.324(8) |
| N1-C17                 | 1.472(4) |          |          |
| O7-C11-O7 <sup>1</sup> | 110.3(6) | O2-C5-C6 | 112.7(3) |
| O7-C11-O6 <sup>1</sup> | 110.0(3) | O2-C4-C3 | 106.7(3) |

|                                       |           |             |          |
|---------------------------------------|-----------|-------------|----------|
| O7 <sup>1</sup> -C11-O6 <sup>1</sup>  | 106.8(3)  | F2-C12-C11  | 116.3(3) |
| O7-C11-O6                             | 106.8(3)  | F2-C12-C13  | 119.4(4) |
| O7 <sup>1</sup> -C11-O6               | 110.0(3)  | C11-C12-C13 | 124.3(4) |
| O6 <sup>1</sup> -C11-O6               | 113.0(4)  | F1-C16-C15  | 120.7(4) |
| O10 <sup>2</sup> -C12-O10             | 112.3(10) | F1-C16-C11  | 116.3(4) |
| O10 <sup>2</sup> -C12-O8              | 115.5(8)  | C15-C16-C11 | 123.0(4) |
| O10-C12-O8                            | 101.0(5)  | O1-C3-C4    | 112.5(3) |
| O10 <sup>2</sup> -C12-O8 <sup>2</sup> | 101.0(5)  | N1-C17-C11  | 112.7(3) |
| O10-C12-O8 <sup>2</sup>               | 115.5(8)  | O5-C1-C2    | 108.2(3) |
| O8-C12-O8 <sup>2</sup>                | 112.2(8)  | O5-C10-C9   | 106.5(3) |
| C5-O2-C4                              | 114.9(3)  | O4-C8-C7    | 112.4(3) |
| C6-O3-C7                              | 112.6(3)  | O3-C6-C5    | 108.8(3) |
| C1-O5-C10                             | 113.0(3)  | O1-C2-C1    | 109.8(3) |
| C2-O1-C3                              | 113.1(3)  | O3-C7-C8    | 108.7(3) |
| C9-O4-C8                              | 113.1(3)  | O4-C9-C10   | 108.8(3) |
| C12-C11-C16                           | 113.7(3)  | C14-C15-C16 | 118.7(5) |
| C12-C11-C17                           | 124.5(3)  | C13-C14-C15 | 121.1(5) |
| C16-C11-C17                           | 121.8(3)  | C14-C13-C12 | 119.1(5) |

Table S2. Bond lengths (Å) and angles (°) of **2** at 293 K

---

2

|        |          |        |           |
|--------|----------|--------|-----------|
| Re1-O2 | 1.685(8) | O5-C18 | 1.433(12) |
| Re1-O4 | 1.688(7) | C8-C30 | 1.364(12) |

|            |           |             |           |
|------------|-----------|-------------|-----------|
| Re1-O3     | 1.703(7)  | C8-C33      | 1.380(12) |
| Re1-O1     | 1.731(8)  | C8-C12      | 1.503(9)  |
| N1-C12     | 1.497(10) | C10-C13     | 1.479(14) |
| O6-C13     | 1.400(12) | C11-C22     | 1.52(2)   |
| O6-C19     | 1.409(11) | C14-C24     | 1.495(17) |
| O7-C10     | 1.416(12) | C17-C21     | 1.336(17) |
| O7-C14     | 1.413(12) | C17-C33     | 1.374(14) |
| O8-C24     | 1.404(13) | C18-C19     | 1.471(18) |
| O8-C34     | 1.409(14) | C21-C35     | 1.396(18) |
| O9-C11     | 1.402(13) | C26-C34     | 1.476(17) |
| O9-C26     | 1.418(13) | C30-F2      | 1.351(11) |
| F1-C33     | 1.355(11) | C30-C35     | 1.371(12) |
| O5-C22     | 1.399(17) |             |           |
| O2-Re1-O4  | 108.4(6)  | O6-C13-C10  | 109.0(9)  |
| O2-Re1-O3  | 109.8(5)  | O7-C14-C24  | 112.3(8)  |
| O4-Re1-O3  | 110.4(5)  | C21-C17-C33 | 118.5(10) |
| O2-Re1-O1  | 111.2(6)  | C19-C18-O5  | 109.1(8)  |
| O4-Re1-O1  | 107.4(6)  | C18-C19-O6  | 107.8(10) |
| O3-Re1-O1  | 109.6(4)  | C17-C21-C35 | 121.9(10) |
| C13-O6-C19 | 115.7(9)  | O5-C22-C11  | 113.4(9)  |
| C10-O7-C14 | 113.1(9)  | O8-C24-C14  | 106.0(9)  |
| C24-O8-C34 | 113.5(8)  | O9-C26-C34  | 109.1(9)  |
| C11-O9-C26 | 112.8(10) | O8-C34-C26  | 113.0(9)  |
| C22-O5-C18 | 113.8(10) | F2-C30-C8   | 115.9(7)  |

|            |           |             |           |
|------------|-----------|-------------|-----------|
| C30-C8-C33 | 114.9(8)  | F2-C30-C35  | 119.2(9)  |
| C30-C8-C12 | 123.8(8)  | C8-C30-C35  | 124.8(10) |
| C33-C8-C12 | 121.3(8)  | F1-C33-C8   | 118.4(8)  |
| O7-C10-C13 | 109.8(9)  | F1-C33-C17  | 118.2(9)  |
| O9-C11-C22 | 110.2(10) | C8-C33-C17  | 123.5(10) |
| N1-C12-C8  | 112.1(6)  | C30-C35-C21 | 116.4(10) |

Table S3. The hydrogen bond length [ $\text{\AA}$ ] and bond angle [ $^\circ$ ] in compound **1**.

| D-H $\cdots$ A      | D-H [ $\text{\AA}$ ] | H $\cdots$ A [ $\text{\AA}$ ] | D $\cdots$ A [ $\text{\AA}$ ] | D-H $\cdots$ A [ $^\circ$ ] |
|---------------------|----------------------|-------------------------------|-------------------------------|-----------------------------|
| N1--H1A $\cdots$ O2 | 0.89                 | 2.02                          | 2.871(3)                      | 160                         |
| N1--H1A $\cdots$ O3 | 0.89                 | 2.42                          | 2.941(4)                      | 118                         |
| N1-H1B $\cdots$ O4  | 0.89                 | 1.97                          | 2.830(3)                      | 161                         |
| N1-H1B $\cdots$ O5  | 0.89                 | 2.56                          | 3.015(4)                      | 113                         |
| N1-H1C $\cdots$ F2  | 0.89                 | 2.36                          | 2.887(4)                      | 118                         |
| N1-H1C $\cdots$ O1  | 0.89                 | 2.43                          | 2.914(3)                      | 115                         |
| N1-H1C $\cdots$ O8  | 0.89                 | 2.38                          | 2.989(9)                      | 125                         |

Table S4. The hydrogen bond length [ $\text{\AA}$ ] and bond angle [ $^\circ$ ] in compound **2**.

| D-H $\cdots$ A     | D-H [ $\text{\AA}$ ] | H $\cdots$ A [ $\text{\AA}$ ] | D $\cdots$ A [ $\text{\AA}$ ] | D-H $\cdots$ A [ $^\circ$ ] |
|--------------------|----------------------|-------------------------------|-------------------------------|-----------------------------|
| N1-H1A $\cdots$ F2 | 0.89                 | 2.54                          | 2.887(8)                      | 104                         |
| N1-H1A $\cdots$ O7 | 0.89                 | 2.50                          | 2.908(8)                      | 108                         |
| N1-H1A $\cdots$ O3 | 0.89                 | 2.13                          | 2.889(10)                     | 143                         |
| N1-H1B $\cdots$ O5 | 0.89                 | 1.95                          | 2.833(9)                      | 169                         |
| N1-H1B $\cdots$ O6 | 0.89                 | 2.50                          | 2.994(8)                      | 115                         |

|             |      |      |          |     |
|-------------|------|------|----------|-----|
| N1-H1C···O7 | 0.89 | 2.57 | 2.908(9) | 103 |
| N1-H1C···O8 | 0.89 | 2.01 | 2.895(8) | 172 |
| N1-H1C···O9 | 0.89 | 2.49 | 2.903(8) | 109 |
